# Supplementary material for: Interaction between ACOT7 and LncRNA NMRAL2P via Methylation Regulates Gastric Cancer Progression
Source: PubMed Central journal article supplement — Yonsei Med J. 2020 May 25;61(6):471–81. doi: 10.3349/ymj.2020.61.6.471 (PMC7256001; doi:10.3349/ymj.2020.61.6.471), 2020-05-25
Supplement: ymj-61-471-s001.pdf [file ymj-61-471-s001.pdf]

**Supplementary Table 1.** Clinicopathological Characteristics of the 10 Tissue Samples from Gastric Cancer Patients

| Category                   | n=10 |
|----------------------------|------|
| Sex                        |      |
| Male                       | 6    |
| Female                     | 4    |
| Age                        |      |
| <60                        | 3    |
| ≥60                        | 7    |
| Tumor size, cm             |      |
| <5                         | 7    |
| ≥5                         | 3    |
| Depth of invasion          |      |
| T1–T2                      | 6    |
| T3–T4                      | 4    |
| Stages                     |      |
| I–II                       | 5    |
| III–IV                     | 5    |
| Differentiation            |      |
| Well and moderate          | 3    |
| Poorly and not             | 7    |
| Lymph node metastases      |      |
| 0                          | 2    |
| ≥1                         | 8    |
| Metastases to other organs |      |
| Present                    | 1    |
| Absent                     | 9    |
