# Supplementary material for: Interaction between ACOT7 and LncRNA NMRAL2P via Methylation Regulates Gastric Cancer Progression
Source: PubMed Central journal article supplement — Yonsei Med J. 2020 May 25;61(6):471–81. doi: 10.3349/ymj.2020.61.6.471 (PMC7256001; doi:10.3349/ymj.2020.61.6.471), 2020-05-25
Supplement: ymj-61-471-s002.pdf [file ymj-61-471-s002.pdf]

**Supplementary Table 2.** Primer Sequences Used for qRT-PCR

| <b>Gene</b> | <b>Forward primer (5'-3')</b> | <b>Reverse primer (5'-3')</b> |
|-------------|-------------------------------|-------------------------------|
| ACOT7       | CTGCACCCTGCACGGCTTTG          | CGGAAGCTGTGACGATGTTG          |
| NMRAL2P     | TGCAACACCGAAGGATTCC           | CAAGTCCGAGGCTTCTCAT           |
| DNMT1       | AGAACGGTGCTCATGCTTACA         | CTCTACGGGCTTCACTTC TTG        |
| DNMT3a      | AAGGAGGAGCGCCAAGAG            | ATCACCGCAGGGTCCTTT            |
| DNMT3b      | AGGGAAGACTCGATCCTCGTC         | GTGTGTAGCTTAGCAGACTGG         |
| GAPDH       | GCACCGTCAAGGCTGAGAAC          | TGGTGAAGACGCCAGTGGA           |
