# Supplementary material for: Interaction between ACOT7 and LncRNA NMRAL2P via Methylation Regulates Gastric Cancer Progression
Source: PubMed Central journal article supplement — Yonsei Med J. 2020 May 25;61(6):471–81. doi: 10.3349/ymj.2020.61.6.471 (PMC7256001; doi:10.3349/ymj.2020.61.6.471), 2020-05-25
Supplement: ymj-61-471-s003.pdf [file ymj-61-471-s003.pdf]

**Supplementary Table 3.** Part of the Data Downloaded from the GEO Database

| ID            | adj.P.Val | p value | t          | B     | logFC      | SPOT_ID                                                   | GB_ACC       | Sequence                                                       |
|---------------|-----------|---------|------------|-------|------------|-----------------------------------------------------------|--------------|----------------------------------------------------------------|
| A_23_P398449  | 1         | 0.00837 | -2.8893512 | -4.55 | -2.4270835 | A_23_P398449                                              | NR_028291    | ACATATCATTGTGACCCAGAAAGATGGAATCTATGGTTGGATCTTACCAGGGAGAGCAT    |
| A_33_P3276630 | 1         | 0.00948 | -2.8351713 | -4.55 | -1.7226217 | A_33_P3276630                                             | BC054892     | GCAAGACAGCTGACTGCCTTCCAGAGAAAAAGTGGCCAACAATCACAATAAAAGATTAG    |
| A_21_P0001075 | 1         | 0.01018 | -2.804401  | -4.55 | -1.6023122 | ens ENST00000430921 tc THC2690712 linc TCO<br>NS_00000419 |              | GGACCAGAAAACCATATGTGGCAACTTATAAACTGCCTCTAGCTATATAGATTAATAC     |
| A_21_P0008478 | 1         | 0.01343 | -2.682353  | -4.56 | -1.9489863 | linc TCONS_00022841                                       |              | TTCCAGCATCCAGAAAACCTGCCTGAACCTGTGCTGTAGGCATGAATCCCACTCCCTGACAC |
| A_24_P233078  | 1         | 0.01575 | -2.6113065 | -4.56 | -1.8911359 | A_24_P233078                                              | NR_003064    | GCCCACCTCATTTACATGTTCACTCCCGACCCTGGAAACCCGGATTTCGCCTCCGGACAG   |
| A_33_P3260974 | 1         | 0.01781 | -2.5557938 | -4.56 | -2.1323146 | A_33_P3260974                                             | DA734158     | AAGAACTGGGAGACTACAGCTCAGTATAAGTAGAAATAGTGAGAGGTGACCACGGGCTA    |
| A_33_P3282641 | 1         | 0.01782 | -2.5557005 | -4.56 | -2.1319472 | A_33_P3282641                                             | NR_033752    | AATACAGCAATATGCTGATGTTTTGTCCAAGGTTTTGGGAAAGAAGTCCGAGATGCAAA    |
| A_23_P335981  | 1         | 0.01785 | -2.5550224 | -4.56 | -2.1505391 | A_23_P335981                                              | NM_173860    | AGCGCCGGAGGGAACCTCTCAGACCGCTTGAATCTTAGTGACCAGCAGGTCAAGATCTGGT  |
| A_23_P303101  | 1         | 0.01938 | -2.5176437 | -4.56 | -1.5621852 | A_23_P303101                                              | NM_032406    | GTGATGTCACCATTTTTGTAAGAGGTAACCTATGTGGTAGACGCTGTGCTTTGTAACCTGT  |
| A_33_P3250695 | 1         | 0.01974 | -2.5093461 | -4.56 | -1.4263804 | A_33_P3250695                                             | NM_031856    | GGCGAAGAGCAAGATTTAAATGTTGATCATGGCCTCAAAGTAAGTCCATTTAAATTTAGA   |
| A_33_P3718274 | 1         | 0.02119 | -2.4769845 | -4.56 | -1.4838295 | A_33_P3718274                                             | DB296219     | TAACCATAACCTTTTACAGACAATAGTGGTTCTGAGCAAAACATGAGCGCACGTGTGTGAT  |
| A_33_P3357738 | 1         | 0.02152 | -2.4698647 | -4.56 | -1.6027725 | A_33_P3357738                                             | BC021736     | GGGTGTTGGAAAATGCTGATTCATCCATTGCCTATTAATTGCTCAGCCAAAAGAAAAAA    |
| A_32_P8925    | 1         | 0.02239 | -2.4517235 | -4.56 | -1.5238078 | A_32_P8925                                                | NM_001012970 | GAGATTGATTGGAACAGAAATTAGCCACAGTTTCGCTGAATCCTCGACCGCTTAATTCA    |
| A_23_P110276  | 1         | 0.02241 | 2.4512985  | -4.56 | 2.4407718  | A_23_P110276                                              | NR_026892    | TATGATGGGGTAGAGGATAATGCCTATGCTTACAAAGTGGCTGTGGGAAGTAAACCGGAT   |
| A_33_P3381621 | 1         | 0.02378 | -2.4240892 | -4.56 | -1.4757875 | A_33_P3381621                                             | BC065041     | TCTTATCAGACTCCTGGGTCAGCAAATCCAACAGGAAATGCACCAGAAAAGCACCAAATC   |
| A_23_P161458  | 1         | 0.02426 | -2.4149679 | -4.56 | -1.5355019 | A_23_P161458                                              | NM_001039702 | GGATCTGAAGACATAGCAAAGGACATGGAAGCCTGGAAGATGTAACCAGTGGAAATGCT    |
| A_21_P0001889 | 1         | 0.02747 | -2.3572854 | -4.57 | -1.3677003 | ens ENST00000453878 linc TCONS_00002957                   |              | TGGCATTATGTGAAGACATTAACCTTGGTTACCAAATTAATATCCAGGCCCTGGACAGC    |
| A_21_P0003568 | 1         | 0.02795 | -2.3492363 | -4.57 | -1.4274382 | A_21_P0003568                                             | NM_018088    | TAATTTACAGGTGACCCAAAATCAACCCCTGAAAAAGGCGGTGATAAAACCCCAAGGAGA   |
| A_33_P3387493 | 1         | 0.0287  | 2.3368361  | -4.57 | 2.0212567  | A_33_P3387493                                             |              | GGACGTCCATGTTGCCTTTTTCAGAACATTCCTTCAATTTTTCTCCTCTCAGTTTGACCAT  |
| A_21_P0006541 | 1         | 0.02874 | -2.3361631 | -4.57 | -1.4277106 | linc TCONS_00017353                                       |              | GGGCCAGAGTCAGACCCAGAAGTACTATAAGACCAGCTATCTCTCCAAAACATTTAGAA    |
